# Supplementary material
Source: PubMed Central journal article supplement (PMC5997188)
Supplement: NIHMS861487-supplement.pdf [file NIHMS861487-supplement.pdf]

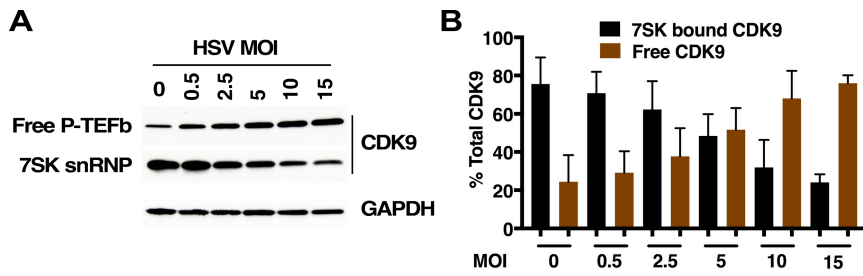

**Figure S1. HSV-1 infection induces the release of P-TEFb from the 7SK snRNP. Related to Figures 1-3.**

MRC5 cells were infected with HSV-1 at the indicated MOI for 2 h. Cells were lysed and subjected to differential extraction to obtain Free and 7SK snRNP bound CDK9 fractions. (A) Western blot of CDK9 and loading control GAPDH (7SK snRNP fraction). (B) Quantitation of bound and free CDK9 shown as a percentage of total CDK9 from 2 independent experiments.

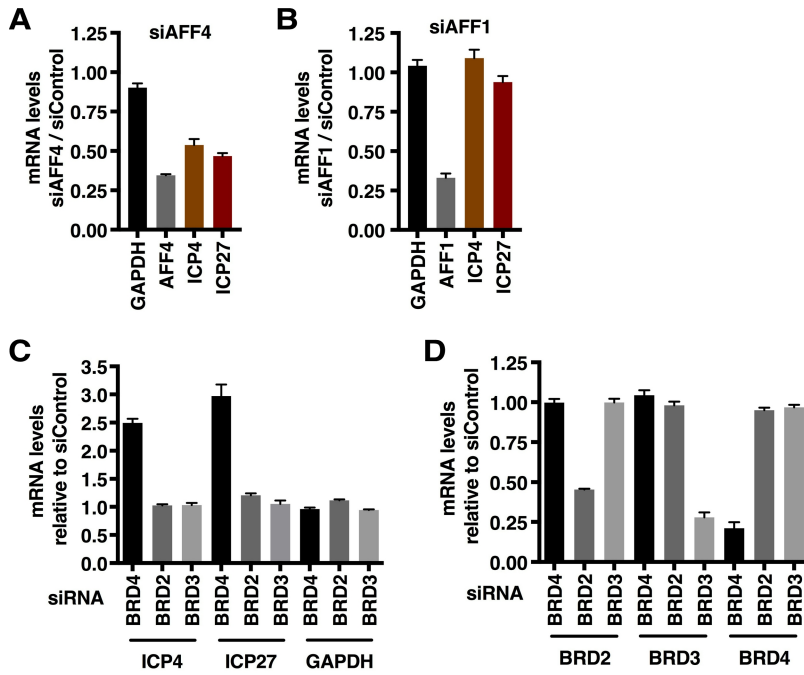

**Figure S2. Depletion of AFF1, BRD2 or BRD3 does not impact HSV IE gene expression. Related to Figure 3.**

(A-C) MRC5 cells were transfected with siControl or siRNAs to AFF4, AFF1, BRD2, BRD3, or BRD4. Cells were infected with HSV-1 for 2 h and mRNA levels of the siRNA targets, control cellular (GAPDH), and viral IE (ICP4, ICP27) genes were determined. Data is shown as levels relative to those in control siRNA cells. (D) mRNA levels of BRD2, BRD3, and BRD4 in cells transfected with the indicated BRD siRNA. Data are means  $\pm$  s.e.m.,  $n > 4$ .

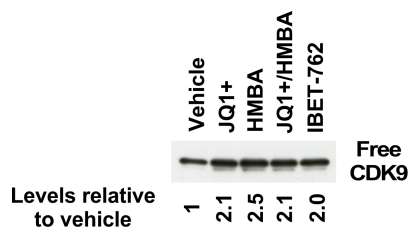

**Figure S3. BRD inhibitors induce the release of P-TEFb from the 7SK snRNP. Related to Figure 3.** Western blot of free CDK9 fractions obtained by differential extraction of MRC5 cells treated with vehicle or the indicated compound for 3 h.

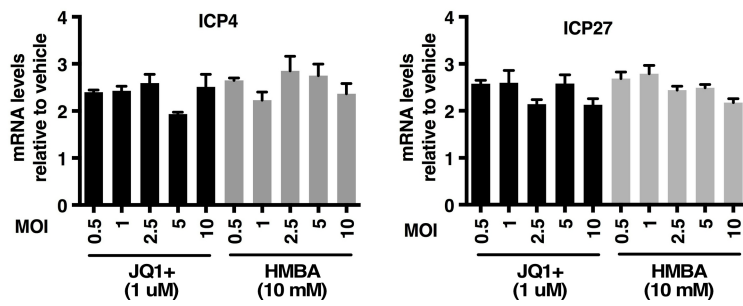

**Figure S4. Induction of HSV-1 IE transcription by BRD inhibitors is not MOI dependent. Related to Figure 3.**

mRNA levels of HSV-1 IE genes (ICP4, ICP27) in cells treated with vehicle, JQ1+ or HMBA and infected at the indicated MOI. Levels were normalized to cellular control GAPDH and shown relative to those in vehicle treated cells. Data are means  $\pm$  s.e.m.,  $n = 3$ .

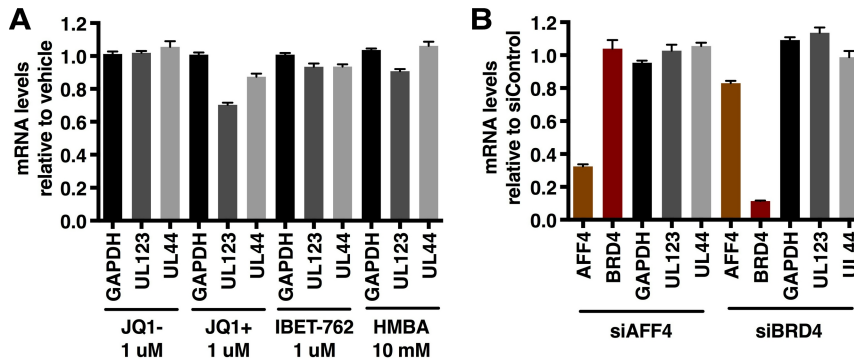

**Figure S5. hCMV IE gene expression is not dependent on AFF4 or BRD4. Related to Figure 3.**  
 (A) HFF cells were treated with control vehicle, control JQ1-, or the BRD inhibitors JQ1+, IBET-762, or HMBA and infected with hCMV for 2 hrs. The levels of control cellular GAPDH and viral IE mRNAs are shown relative to the levels in vehicle treated cells. (B) MRC5 cells transfected with siRNAs to AFF4, BRD4, or control siRNAs were infected with hCMV for 2 hrs. The levels of target, control GAPDH, and hCMV IE mRNAs are shown relative to levels in siControl cells. Data are means +/- s.e.m., n = 2.

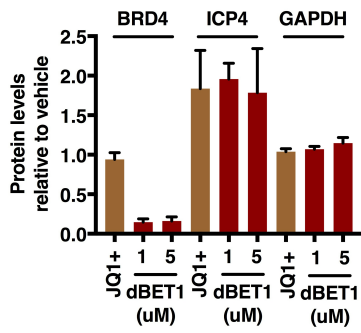

**Figure S6. dBET1 mediated turnover of BRD4 enhances IE mRNA levels. Related to Figure 3.** MRC5 cells treated with vehicle, JQ1+, or dBET1 and infected with HSV-1 for 2 h. Quantitation of western blot of ICP4, BRD4, and control GAPDH protein levels shown in Figure 3. Data are means +/- s.e.m., n = 3.

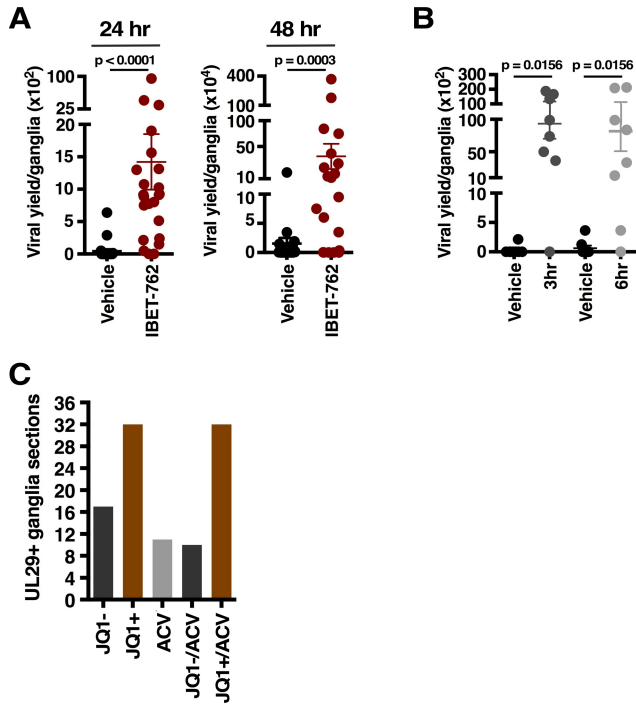

**Figure S7. BET inhibitors induce HSV reactivation in a ganglia explant model system. Related to Figure 6.**

(A) Viral yields from HSV-1 latently infected trigeminal ganglia explanted into culture in the presence of the BRD4-BET inhibitor IBET-762 or control Vehicle for 24 or 48 h ( $n \geq 20$ ). (B) Viral yields from HSV-1 latently infected trigeminal ganglia explanted into culture in the presence of JQ1+ or Vehicle for 3 or 6 h, followed by removal of the drugs and continued incubation for a total of 36 h post explant ( $n = 8$ ). (C) The number of ganglia sections exhibiting UL29+ cells.

Table S1. Selected HCF-1 associated proteins in mock and HSV infected cells. Related to Figure 1.

| HCF-1; HCFC1                                         | HCFC1                                                                            | Gene name                                                             | Accession     | MW     | AA   | MRC5                 |                       |            |            |   |
|------------------------------------------------------|----------------------------------------------------------------------------------|-----------------------------------------------------------------------|---------------|--------|------|----------------------|-----------------------|------------|------------|---|
|                                                      |                                                                                  |                                                                       |               |        |      | Spectral counts Mock | Spectral counts 2hpi* | SAINT Mock | SAINT 2hpi |   |
|                                                      |                                                                                  | <i>HCF-1</i>                                                          | <i>P51610</i> | 209    | 2035 | 393                  | 393                   | 1          | 1          |   |
| <b>Protein class</b>                                 | <b>Protein name</b>                                                              | <b>Description</b>                                                    |               |        |      |                      |                       |            |            |   |
| Mediator Complex                                     | Mediator of RNA polymerase II transcription subunit 1                            | MED1                                                                  | Q15648        | 168    | 1581 | 4                    | 110                   | 1          | 1          |   |
|                                                      | Mediator of RNA polymerase II transcription subunit 23                           | MED23                                                                 | Q9ULK4        | 156    | 1368 | 6                    | 61                    | 1          | 1          |   |
|                                                      | Mediator of RNA polymerase II transcription subunit 14                           | MED14                                                                 | O60244        | 161    | 1454 | 0                    | 61                    | NA         | 1          |   |
|                                                      | Mediator of RNA polymerase II transcription subunit 24                           | MED24                                                                 | O75448        | 110    | 989  | 0                    | 58                    | NA         | 1          |   |
|                                                      | Mediator of RNA polymerase II transcription subunit 16                           | MED16                                                                 | Q9Y2X0        | 97     | 877  | 0                    | 44                    | NA         | 1          |   |
|                                                      | Mediator of RNA polymerase II transcription subunit 17                           | MED17                                                                 | Q9NVC6        | 97     | 877  | 0                    | 40                    | NA         | 1          |   |
|                                                      | Mediator of RNA polymerase II transcription subunit 13                           | MED13                                                                 | Q9UHV7        | 239    | 2174 | 0                    | 38                    | NA         | 1          |   |
|                                                      | Mediator of RNA polymerase II transcription subunit 13-like                      | MED13L                                                                | Q71F56        | 243    | 2210 | 0                    | 34                    | NA         | 1          |   |
|                                                      | Mediator of RNA polymerase II transcription subunit 4                            | MED4                                                                  | Q9NPJ6        | 30     | 270  | 0                    | 31                    | NA         | 1          |   |
|                                                      | Cyclin-dependent kinase 8                                                        | CDK8                                                                  | P49336        | 53     | 464  | 0                    | 21                    | NA         | 1          |   |
|                                                      | Cyclin-C                                                                         | CCNC                                                                  | P24863        | 33     | 283  | 0                    | 20                    | NA         | 1          |   |
|                                                      | Mediator of RNA polymerase II transcription subunit 6                            | MED6                                                                  | O75586        | 28     | 246  | 0                    | 12                    | NA         | 1          |   |
|                                                      | Mediator of RNA polymerase II transcription subunit 31                           | MED31                                                                 | Q9Y3C7        | 16     | 131  | 0                    | 11                    | NA         | 1          |   |
|                                                      | Mediator of RNA polymerase II transcription subunit 12                           | MED12                                                                 | Q93074        | 243    | 2177 | 0                    | 11                    | NA         | 1          |   |
|                                                      | Mediator of RNA polymerase II transcription subunit 18                           | MED18                                                                 | Q9BUE0        | 24     | 208  | 0                    | 7                     | NA         | 1          |   |
|                                                      | Mediator of RNA polymerase II transcription subunit 27                           | MED27                                                                 | Q6P2C8        | 35     | 311  | 0                    | 6                     | NA         | 1          |   |
|                                                      | Mediator of RNA polymerase II transcription subunit 26                           | MED26                                                                 | Q95402        | 65     | 600  | 0                    | 6                     | NA         | 1          |   |
|                                                      | Mediator of RNA polymerase II transcription subunit 20                           | MED20                                                                 | Q9H944        | 23     | 212  | 0                    | 5                     | NA         | 1          |   |
|                                                      | Mediator of RNA polymerase II transcription subunit 7                            | MED7                                                                  | O43513        | 27     | 233  | 0                    | 5                     | NA         | 1          |   |
|                                                      | Mediator of RNA polymerase II transcription subunit 22                           | MED22                                                                 | Q15528        | 22     | 200  | 0                    | 4                     | NA         | 1          |   |
| Transcription Elongation                             | AF4/FMR2 family member 4                                                         | AFP4                                                                  | Q9UHB7        | 127    | 1163 | 13                   | 22                    | 1          | 1          |   |
|                                                      | Protein ENL                                                                      | MLLT1                                                                 | Q03111        | 62     | 559  | 0                    | 8                     | NA         | 1          |   |
|                                                      | RNA polymerase II elongation factor ELL                                          | ELL                                                                   | P55199        | 68     | 621  | 0                    | 5                     | NA         | 1          |   |
|                                                      | RNA polymerase II elongation factor ELL2                                         | ELL2                                                                  | O00472        | 72     | 640  | 0                    | 5                     | NA         | 1          |   |
|                                                      | Cyclin-dependent kinase 9                                                        | CDK9                                                                  | P50750        | 43     | 372  | 6                    | 4                     | 1          | 1          |   |
|                                                      | RNA polymerase II-associated factor 1 homolog                                    | PAF1 Complex                                                          | PAF1          | Q8N7H5 | 60   | 531                  | 14                    | 18         | 1          | 1 |
|                                                      | Parafibromin                                                                     | PAF1 Complex                                                          | CDC73         | Q6P1J9 | 61   | 531                  | 6                     | 13         | 1          | 1 |
|                                                      | RNA polymerase-associated protein CTR9 homolog                                   | PAF1 Complex                                                          | CTR9          | Q6PD62 | 134  | 1173                 | 10                    | 9          | 1          | 1 |
|                                                      | RNA polymerase-associated protein LEO1                                           | PAF1 Complex                                                          | LEO1          | Q8WVC0 | 75   | 666                  | 4                     | 6          | 1          | 1 |
|                                                      | WD repeat-containing protein 61                                                  | PAF1 Complex                                                          | WDR61         | Q9GZS3 | 34   | 305                  | 5                     | 6          | 1          | 1 |
|                                                      | FACT complex subunit SPT16                                                       | FACT Complex                                                          | SUPT16H       | Q9Y5B9 | 120  | 1047                 | 37                    | 60         | 1          | 1 |
|                                                      | FACT complex subunit SSRP1                                                       | FACT Complex                                                          | SSRP1         | Q08945 | 81   | 709                  | 21                    | 27         | 1          | 1 |
|                                                      | La-related protein 7                                                             | 7SK snRNP Complex. Associates with and inhibits the P-TEF-b Complex   | LARP7         | Q4G0J3 | 67   | 582                  | 4                     | 4          | 1          | 1 |
|                                                      | Histone-lysine N-methyltransferase SETD2                                         | H3K36 Histone methyltransferase                                       | SETD2         | Q9BYW2 | 288  | 2564                 | 24                    | 25         | 1          | 1 |
| RNAPII subunits and Transcription Initiation factors | DNA-directed RNA polymerase II subunit RPB1                                      | RNAPII subunit                                                        | POLR2A        | P24928 | 217  | 1970                 | 42                    | 40         | 1          | 1 |
|                                                      | DNA-directed RNA polymerase II subunit RPB2                                      | RNAPII subunit                                                        | POLR2B        | P30876 | 134  | 1174                 | 20                    | 51         | 1          | 1 |
|                                                      | DNA-directed RNA polymerases I, II, and III subunit RPABC1                       | RNAPII subunit                                                        | POLR2E        | P19388 | 25   | 210                  | 0                     | 4          | NA         | 1 |
|                                                      | Transcription initiation factor TFIID subunit 5                                  | Transcription Initiation factor                                       | TAF5          | Q15542 | 87   | 800                  | 0                     | 4          | NA         | 1 |
|                                                      | TATA-binding protein-associated factor 2N                                        | Transcription Initiation factor                                       | TAF15         | Q92804 | 62   | 592                  | 4                     | 17         | 1          | 1 |
| Chromatin Modification/Protein Modification          | Histone-lysine N-methyltransferase 2A                                            | MLL1-2/COMPASS like Complex; H3K4 methyltransferase                   | KMT2A         | Q03164 | 432  | 3969                 | 9                     | 12         | 1          | 1 |
|                                                      | Histone-lysine N-methyltransferase 2E                                            | MLL5 Complex; H3K4 methyltransferase                                  | KMT2E         | Q8IZD2 | 205  | 1858                 | 14                    | 11         | 1          | 1 |
|                                                      | Histone-lysine N-methyltransferase 2C                                            | MLL3-4/COMPASS like Complex; H3K4 methyltransferase                   | KMT2C         | Q8NEZ4 | 541  | 4911                 | 3                     | 4          | 1          | 1 |
|                                                      | UDP-N-acetylglucosamine--peptide N-acetylglucosaminyltransferase 110 kDa subunit | O-Linked N-Acetylglucosamine (GlcNAc) Transferase                     | OGT           | O15294 | 117  | 1046                 | 158                   | 198        | 1          | 1 |
|                                                      | Ubiquitin carboxyl-terminal hydrolase BAP1                                       | Polycomb repressive deubiquitinase (PR-DUB) complex                   | BAP1          | Q92560 | 80   | 729                  | 59                    | 77         | 1          | 1 |
|                                                      | Histone-lysine N-methyltransferase SETD1A                                        | Set1A-B/COMPASS Complex; H3K4 methyltransferase                       | SETD1A        | O15047 | 186  | 1707                 | 153                   | 143        | 1          | 1 |
|                                                      | Protein dpy-30 homolog                                                           | Set1A-B/COMPASS Complex/also present in other hCOMPASS like Complexes | DPY30         | Q9C005 | 11   | 99                   | 4                     | 6          | 1          | 1 |
|                                                      | Set1/Ash2 histone methyltransferase complex subunit ASH2                         | Set1A-B/COMPASS Complex/also present in other hCOMPASS like Complexes | ASH2L         | Q9UBL3 | 69   | 628                  | 82                    | 85         | 1          | 1 |
|                                                      | CpG-binding protein                                                              | Set1A-B/COMPASS Complex                                               | CXXC1         | Q9P0U4 | 76   | 656                  | 63                    | 84         | 1          | 1 |
|                                                      | WD repeat-containing protein 5                                                   | Set1A-B/COMPASS Complex/also present in other hCOMPASS like Complexes | WDR5          | P61964 | 37   | 334                  | 43                    | 42         | 1          | 1 |
|                                                      | Retinoblastoma-binding protein 5                                                 | Set1A-B/COMPASS Complex/also present in other hCOMPASS like Complexes | RBBP5         | Q15291 | 59   | 538                  | 41                    | 52         | 1          | 1 |
|                                                      | WD repeat-containing protein 82                                                  | Set1A-B/COMPASS Complex                                               | WDR82         | Q6UXN9 | 35   | 313                  | 16                    | 14         | 1          | 1 |

\*Spectra counts were normalized based on HCF-1 spectral counts in uninfected cells



**Table S2. Primer sets used in this study. Related to Experimental Procedures.**

**PRIMERS**

**qRT-PCR**

**Target**

| Target     | Sequence                                           |
|------------|----------------------------------------------------|
| ICP4       | GAAGTTGTGGACTGGGAAGG<br>GTTGCCGTTTATTGCGTCTT       |
| ICP22      | TTTGGGGAGTTTGACTGGAC<br>CAGACACTTGC GG TCTTCTG     |
| ICP27      | GCATCCTTCGTGTTTGTCAATTCTG<br>GCATCTTCTCTCCGACCCCG  |
| UL30       | AGAGGGACATCCAGGACTTTGT<br>CAGGCGCTTGTGGTGTAC       |
| gC         | TGATTATCGGCGAGGTGAC<br>ACAAACTCCACGGGGTTACG        |
| hCMV.UL123 | GCCTTCCCTAAGACCACCAAT<br>ATTTCTGGGCATAAGCCATAATC   |
| hCMV.UL44  | GCCCCGATTCAATATGGAGTTTCAG<br>CGGCCGAATTCTCGCTTTC   |
| HPRT       | ATTGTAATGACCAGTCAACAGGG<br>GCAITGTTTTGCCAGTGTCAA   |
| TUBB       | AAGATCCGAGAAGAATACCTGA<br>CTACCAACTGATGGACGGAGA    |
| GAPDH      | TTCGACAGTCAGCCGCATCTTCTT<br>CAGGCGCCAATACGACCAAATC |
| mGAPDH     | CTGACGTGCCGCCTGGAGAAA<br>CCCGGCATCGAAGGTGGAAGAGT   |
| AFF4       | AAAGGCCAGCATGGATCAGAA<br>GTGATTTGGAGCGTTGATGTTC    |
| AFF1       | CTGAAAATAGGTTGGGAAAGCCG<br>GACGCAGGAGTGTGAATGGA    |
| BRD2       | AATGGCACAAACGCTGGAAAA<br>CACTGGTAACACTGCCCTG       |
| BRD3       | TGCAAGCGAATGTATGCAGGA<br>CATCTGGGCCACTTTTTGTAGAA   |
| BRD4       | GAGCTACCCACAGAAGAAACC<br>GAGTCGATGCTTGAGTTGTGTT    |

**Short RNA Amplification**

**Target**

| Target                                | Sequence                |
|---------------------------------------|-------------------------|
| ICP4 Promoter-Proximal (+57) Forward  | GCCAGAGACAGACCGTCAGA    |
| ICP27 Promoter-Proximal (+81) Forward | CCACCACCAGAGGCCATATC    |
| miR 16 Forward                        | TAGCAGCACGTAATATTGGCG   |
| SNORD44 Forward                       | GCAAATGCTGACTGAACATGAAG |

**Chromatin Immunoprecipitation**

**Target**

| Target                         | Sequence                                               |
|--------------------------------|--------------------------------------------------------|
| ICP4 (-324 to -254)            | GCGGGGCTCGTATCTCATT<br>CCGCATGGCATCTCATTACC            |
| ICP4 Promoter-TSS (-37 to +73) | GCCCCTGGGACTATATGAGC<br>GCGTCTGACGGTCTGTCTCT           |
| ICP4 (+1425 to +1563)          | GATCACGCGGCTGCTGTA<br>ATGAAGGAGCTGCTGTTGCG             |
| ICP0 (-268 to -119)            | TTCGGGAAGGCGGGAAG<br>CCCAAAGAATATCATTAGCATGCAC         |
| ICP0 (+249 to +392)            | ATGTCTGGGGCGCCA<br>GTTCCACGCCCTAACAT                   |
| MYC (+83 to +192)              | TTCTCAGAGGCTTGGCGGGAAA<br>CTGCCTCTCGCTGGAATTACTACA     |
| MYC (+1170 to +1266)           | AACCTGGGTCTCTAGAGGTGTTAGGA<br>TCAACGATTCCAGGAGAATCGGAC |
| MYC (+2242 to +2362)           | ACTCGGTGCAGCCGTATTTCTACT<br>GCAGCAGCTCGAATTTCTCCAGA    |
